# Supplementary material for: Insight into the rapid degradation of antibiotic rifampicin by W-doped O-bridged g-C3N4via the coupling effect of electron replenishment in the dark degradation stage and electrophilic attack in the photocatalytic stage: experiments and DFT simulation calculations
Source: Royal Society of Chemistry journal article supplement (doi:10.1039/d3ta07884a), 2024-01-01
Supplement: d3ta07884a1.pdf [file d3ta07884a1.pdf]

1 **Supplementary Materials**

2 **Insight on the rapid degradation of antibiotic rifampicin by W-doped O-**  
3 **bridged g-C<sub>3</sub>N<sub>4</sub> via coupling effect of electron replenishment effect in dark**  
4 **degradation stage and electrophilic attack in photocatalytic stage:**  
5 **experiments and DFT simulation calculation**

6 Panpan Li<sup>1</sup>, Jingde Luan<sup>1\*</sup>, Longde Jiang<sup>1</sup>, Yu Zhang<sup>1</sup>,

7 Wengang Liu<sup>2</sup>, Zheng Yan<sup>1</sup>, Xin Ke<sup>1</sup>

8 *1 College of Energy and Environment, Shenyang Aerospace University, No.37 Daoyi South*  
9 *Avenue, Shenbei New Area, Shenyang 110136, P.R.China*

10 *2 School of Resources and Civil Engineering, Northeastern University, 11 Wenhua Road,*  
11 *Heping District, Shenyang, 110819, China*

12  
13 *Corresponding authors\*: Jingde Luan*

14 *mail address: jdluan@sau.edu.cn (Jingde Luan)*

## 15 **S1 Electrochemical test**

16 The current  $i$ - $t$  curve and electrochemical impedance spectroscopy (EIS) were measured in  
17 0.1 mol/L  $\text{Na}_2\text{SO}_4$  electrolyte by CHI660E electrochemical workstation. A three-electrode  
18 system was adopted in the test, with platinum wire electrode (Pt) as the counter electrode and  
19 saturated calomel electrode (SCE) as the reference electrode. The sample was dissolved in  
20 anhydrous ethanol and evenly coated on  $1 \times 1 \text{ cm}^2$  glass carbon sheet (GCE) as the working  
21 electrode. In the frequency range of 0.01- $10^5$  Hz, the Mott-Schottky plot was measured. The  
22 current  $i$ - $t$  curve is tested using 300W xenon lamp with filter ( $\lambda \geq 400 \text{ nm}$ ) as light source, tin  
23 foil plate as a shading plate, 30 s darkness and 30 s illumination alternately.

## 24 **S2 LC-HRMS test**

25 LC-HRMS test was performed on Shimadzu 30A using waters C18 Column (120A, 1.7  $\mu\text{m}$ ,  
26 2.1 mm  $\times$  100 mm) at a temperature of 35°C. The mobile phase consisted of 0.1% formic acid  
27 water (A) and acetonitrile (B), and the injection volume was 10  $\mu\text{L}$ .

28 High-resolution mass spectrometry was performed on the AB SCIEX Triple ToF 5600  
29 (time-of-flight mass spectrometry) mass spectrometer, using Analyst TF 1.8 Software for  
30 information acquisition and SCIEX OS software for data analysis. The species structure was  
31 determined by reference to AB's small molecule database. The test was performed in  
32 positive/negative mode (TOF MS IDA) with a scanning range of 40-1000 DA.

33 The liquid to be detected is the clarified liquid that reacts for 8 minutes (the end of dark  
34 reaction), 20 minutes and 40 minutes (the end of photodegradation reaction) under the optimal  
35 working condition.  $400 \text{ nm} < \lambda < 800 \text{ nm}$ ; catalyst amount 10 mg;  $C_0 = 150 \text{ mg/L}$ ; volume

36 100 mL.

### 37 **S3 The construction of computational model**

38 (1) SEM images confirmed that the as-prepared CN and WOCN in this work exhibit as  
39 stacked block structure with flakes, rather than a stripped monolayer structure. Therefore, it is  
40 more reasonable to use a double-layer structure to investigate the effect of modification on the  
41 interlayer charge transfer, according to the relevant researches<sup>1,2</sup>.

42 (2) By calculating the peak area of each valence in the W 4f spectrum of WOCN sample, it  
43 can be found that the proportion of W<sup>6+</sup> (42.0%) and W<sup>5+</sup> (46.9%) is far higher than that of  
44 W<sup>4+</sup> (11.1%), revealing that W<sup>5+</sup> and W<sup>6+</sup> are the main valence states of W element<sup>3,4</sup>. Thus,  
45 the valence states of two W atoms in the model are set to be +6 (W1) and +5 (W2) in DFT  
46 calculation, respectively.

### 47 **S4 Regeneration performance of as-prepared photocatalyst**

48 (1) As shown in Fig. 3h, the characteristic peaks of W-O and W-N bonds in regenerated  
49 WOCN<sub>6</sub>-2 are obviously blue-shifted compared to the original WOCN<sub>6</sub>-2, indicating a  
50 decrease in electron density near the two functional groups, corresponding to the change of W  
51 valence state<sup>5,6</sup>. The W-O absorption peaks at 878 cm<sup>-1</sup> and 737 cm<sup>-1</sup> are significantly  
52 weakened, which is caused by the conversion of some O atoms into CO, CO<sub>2</sub> and other gases  
53 in the regeneration calcination.

54 (2) Seen from Fig.S5, the transient current signal of the regenerated sample shows a  
55 significant decrease under light irradiation, indicating that the electron transfer ability was  
56 weakened compared to the original WOCN<sub>6</sub>-2. However, the current intensity of the

57 regenerated sample is still higher than that of CN, suggesting a stronger charge transfer ability  
58 and catalytic activity<sup>3</sup>.

## 59 S5 Figures

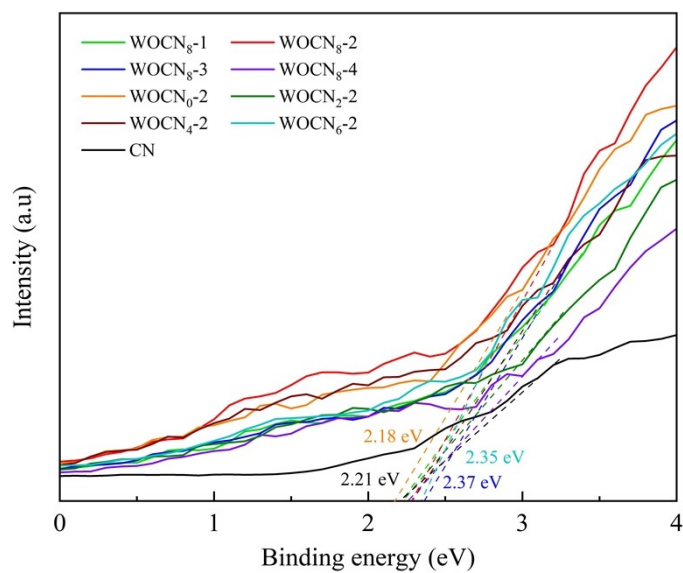

60

61

**Figure S1** XPS-VB spectra of asprepared catalysts.

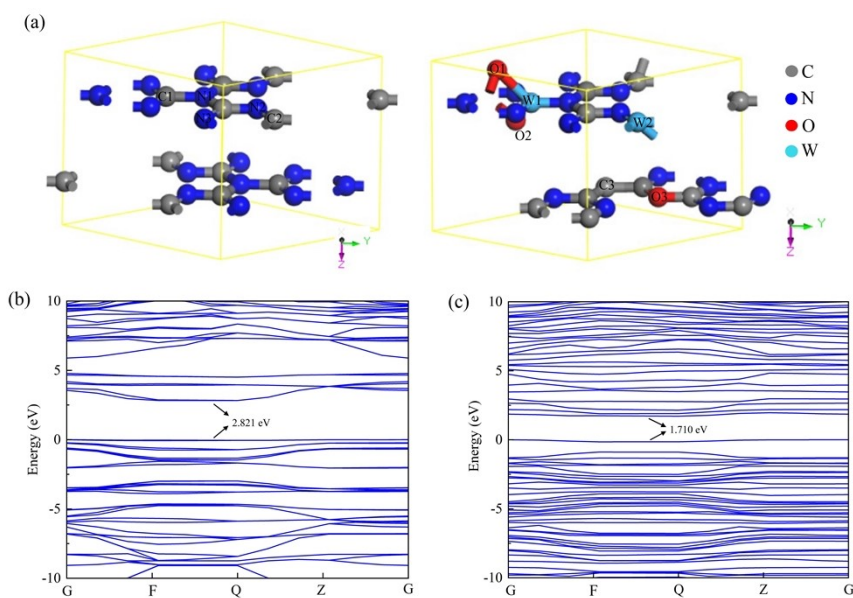

62

63 **Figure S2** (a) The structure models and (b) - (c) calculated band structures of the CN and WOCN<sub>6</sub>-2.

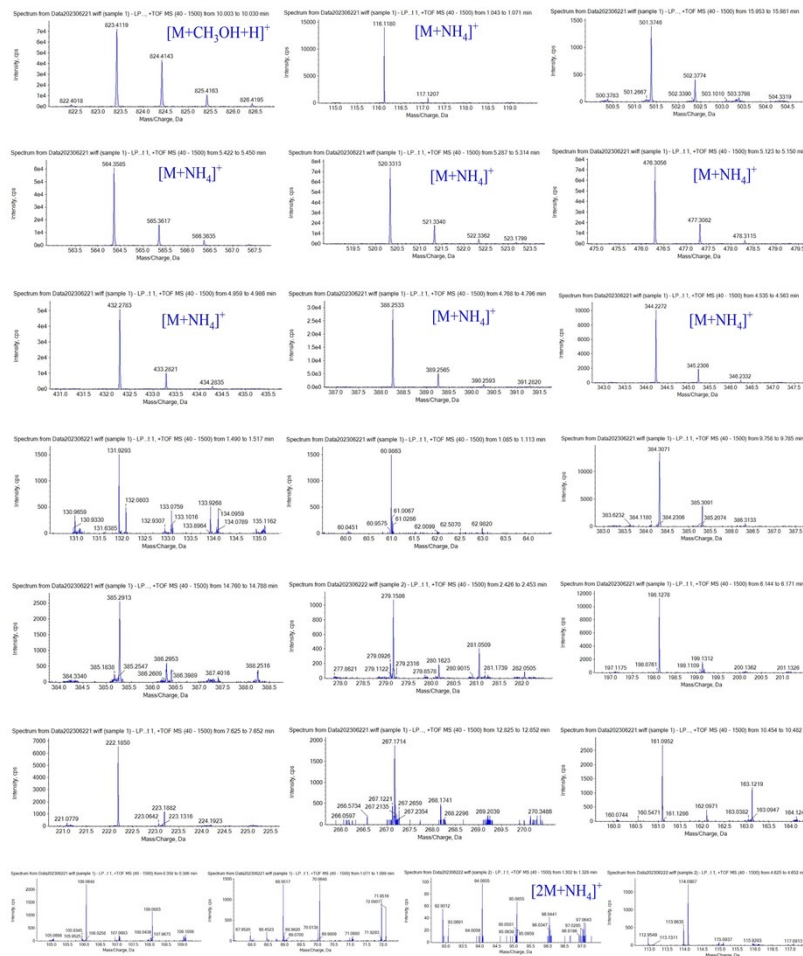

64

65 **Figure S3** LC-HRMS analysis results of dark degradation of RIF by WOCN<sub>6</sub>-2 for 8 minutes.

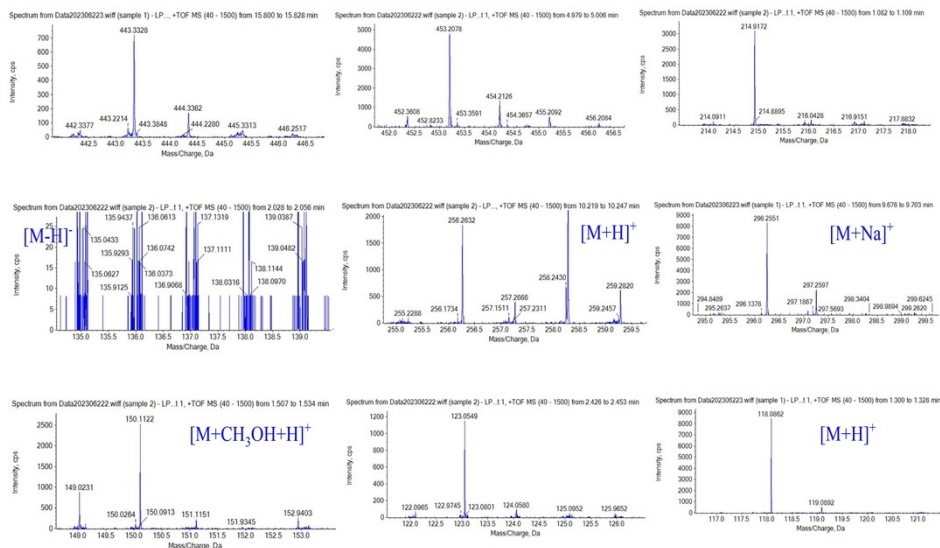

66

67 **Figure S4** LC-HRMS analysis results of photodegrades of RIF by WOCN<sub>6</sub>-2 for 20 minutes and 40

68 minutes.

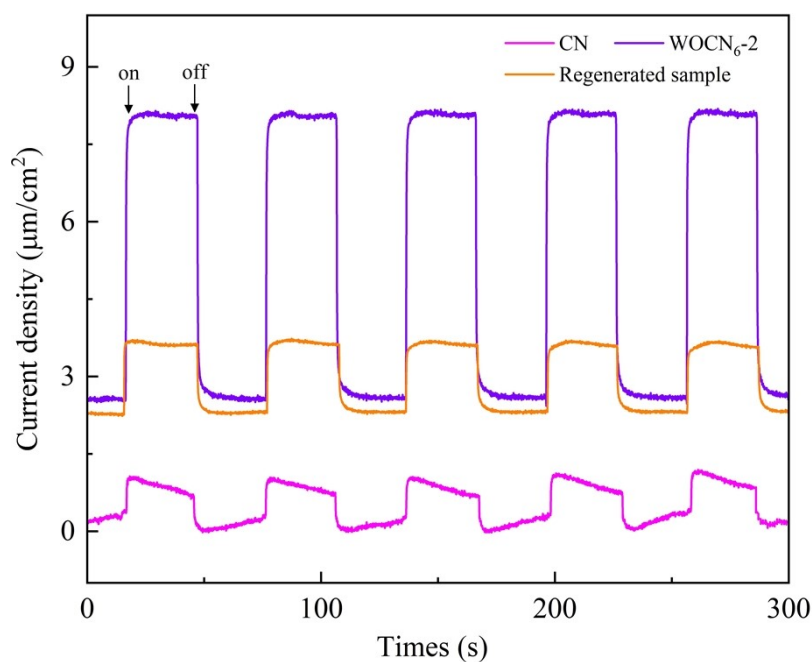

69

70

**Figure S5** i-t spectra of original WOCN<sub>6-2</sub> and regenerated samples

71 **S6 Tables**

72

**Table S1** The specific surface area and average aperture of CN and WOCN<sub>6-2</sub>.

|                     | BET Surface Area (cm <sup>2</sup> /g) | average pore diameter (nm) |
|---------------------|---------------------------------------|----------------------------|
| CN                  | 70.90                                 | 7.78                       |
| WOCN <sub>6-2</sub> | 51.52                                 | 9.61                       |

73

74

**Table S2** Number and structure of possible intermediates in RIF degradation.

| number | m/z                                   | structural formula | name                 |
|--------|---------------------------------------|--------------------|----------------------|
| A      | 116 [M+NH <sub>4</sub> ] <sup>+</sup> |                    | piperazine-2,5-dione |
| B      | 501                                   |                    | Tritoqualine         |
| C      | 564 [M+NH <sub>4</sub> ] <sup>+</sup> |                    | PEG-12               |

|    |                                       |                                                                                     |                            |
|----|---------------------------------------|-------------------------------------------------------------------------------------|----------------------------|
| C1 | 520 [M+NH <sub>4</sub> ] <sup>+</sup> | 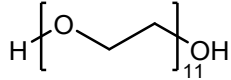   | PEG-11                     |
| C2 | 476 [M+NH <sub>4</sub> ] <sup>+</sup> |    | PEG-10                     |
| C3 | 432 [M+NH <sub>4</sub> ] <sup>+</sup> |    | PEG-9                      |
| C4 | 388 [M+NH <sub>4</sub> ] <sup>+</sup> |    | PEG-8                      |
| C5 | 344 [M+NH <sub>4</sub> ] <sup>+</sup> |    | PEG-7                      |
| D  | 133                                   |    | methyl n - acetylglycinate |
| E  | 61                                    |   | Glycolaldehyde             |
| F  | 384                                   |  | prazosin                   |
| G  | 385                                   |  | JWH-200                    |
| H  | 279                                   |  | dibutyl phthalate          |
| I  | 198                                   |  | beclamide                  |
| J  | 222                                   |  | metaxalone                 |
| K  | 267                                   |  | Zinniol                    |
| L  | 161                                   |  | tryptamine                 |

|   |                                           |                                                                                     |                     |
|---|-------------------------------------------|-------------------------------------------------------------------------------------|---------------------|
| M | 106                                       | 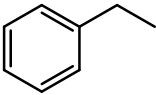   | ethylbenzene        |
| N | 69                                        |    | furan               |
| O | 94                                        |    | 3-methylpyridine    |
| P | 443                                       |    | epicatechin-gallate |
| Q | 453                                       |    | Diphenoxylate       |
| R | 215                                       |    | Pestalotin          |
| S | 137[M-H] <sup>-</sup>                     |   | Salicylic acid      |
| T | 114                                       |  | hept-1-en-3-ol      |
| U | 256 [M+H] <sup>+</sup>                    |  | phenyltoloxamine    |
| V | 296 [M+Na] <sup>+</sup>                   |  | enpropidin          |
| W | 150 [M+CH <sub>3</sub> OH+H] <sup>+</sup> |  | phentermine         |
| X | 123                                       |  | nicotinamide        |
| Y | 118 [M+H] <sup>+</sup>                    |  | betaine             |



**Table S3** Comparison of photocatalytic performance between W-doped O-bridged g-C<sub>3</sub>N<sub>4</sub> and the previously reported carbon nitride

| Photocatalyst                                                 | Light source                                            | Pollutant         | Dosage   | Reaction time                      | Removal rate | References   |
|---------------------------------------------------------------|---------------------------------------------------------|-------------------|----------|------------------------------------|--------------|--------------|
| rh-In <sub>2</sub> O <sub>3</sub> Nanocrystals                | UV lamp Light (intensity Iinc 0.82 mW/cm <sup>2</sup> ) | 10 mg/L Rifampin  | 0.1 g/L  | 120 minutes                        | 94%          | 7            |
| TiO <sub>2</sub> /graphene composite nanofiber photocatalysts | UVC-Philips lamp                                        | 30 mg/L Rifampin  | 0.5 g/L  | 300 minutes                        | 87%          | 8            |
| CdS-ZnS coupled system                                        | 100 W W-lamp                                            | 8 mg/L Rifampin   | 0.5 g/L  | 120 minutes                        | 98%          | 9            |
| ZnIn <sub>2</sub> S <sub>4</sub>                              | 100 W iodogallium lamp (350-450 nm)                     | 10 mg/L Rifampin  | 0.05 g/L | 90 minutes                         | 100%         | 10           |
| MoSe <sub>2</sub> -polypyrrole nanocomposite                  | In dark                                                 | 10 mg/L Congo Red | 0.2 g/L  | 30 minutes                         | 50%          | 11           |
| 6%-CuS/g-C <sub>3</sub> N <sub>4</sub>                        | In dark (0.5 mL 30% H <sub>2</sub> O <sub>2</sub> )     | 30 mg/L RhB       | 0.4 g/L  | 60 minutes                         | 74%          | 12           |
| W-doped O-bridged g-C <sub>3</sub> N <sub>4</sub>             | In dark + 300 W Xenon lamp (≥ 400nm)                    | 150 mg/L Rifampin | 0.1 g/L  | dark 8 minutes<br>light 40 minutes | 91%          | in this work |
|                                                               | In dark                                                 | 10 mg/L Rifampin  | 0.1 g/L  | 5 minutes                          | 100%         |              |

## 78 **References**

- 79 1. Y. Liu, M. Tayyab, W. Pei, L. Zhou, J. Lei, L. Wang, Y. Liu and J. Zhang, *Small* 2023, **19**.
- 80 2. H. Chen, Y. Fan, Z. Fan, H. Xu, D. Cui, C. Xue and W. Zhang, *J Alloys Compd* 2022, **891**.
- 81 3. S. Zhang, S. Song, P. Gu, R. Ma, D. Wei, G. Zhao, T. Wen, R. Jehan, B. Hu and X. Wang, *J Mater*  
82 *Chem A* 2019, **7**, 5552-5560.
- 83 4. H. Chen, J. Motuzas, W. Martens and J. C. Diniz da Costa, *J Environ Sci* 2020, **90**, 110-118.
- 84 5. D.E. Lee, K. P. Reddy, S. Moru, W.-K. Jo and S. Tonda, *Appl Surf Sci* 2023, **610**.
- 85 6. M. Wang, G. Tan, S. Feng, L. Yin, Y. Wang, B. Zhang, L. Lv and H. Ren, *J Hazard Mater* 2021,  
86 **416**.
- 87 7. S. Tang, X. Zhang, S. Li, C. Zheng, H. Li and X. Xiao, *ACS Omega* 2023, **8**, 40099-40109.
- 88 8. M. Sharifi Teshnizi and M. Karimi, *Environ Sci Pollut R* 2023, **30**, 107956-107969.
- 89 9. F. Soleimani and A. Nezamzadeh-Ejehieh, *J Mater Res Technol* 2020, **9**, 16237-16251.
- 90 10. N. Tan, *Xi'an University of Architecture and Technology*, 2016.
- 91 11. H. Mittal and M. Khanuja, *Sep Purif Technol* 2021, **254**.
- 92 12. Y. Ma, J. Zhang, Y. Wang, Q. Chen, Z. Feng and T. Sun, *J Adv Res* 2019, **16**, 135-143.
